# Supplementary material for: Does dynamically modeled leaf area improve predictions of land surface water and carbon fluxes? Insights into dynamic vegetation modules
Source: Copernicus journal article supplement (doi:10.5194/bg-21-5277-2024), 2024-11-27
Supplement: Supplementary file 1 [file bg-21-5277-2024-supplement.pdf]

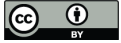

*Supplement of*

## **Does dynamically modeled leaf area improve predictions of land surface water and carbon fluxes? Insights into dynamic vegetation modules**

**Sven Armin Westermann et al.**

*Correspondence to:* Sven Armin Westermann ([sven.westermann@ufz.de](mailto:sven.westermann@ufz.de))

The copyright of individual parts of the supplement might differ from the article licence.

## S.1 Effect of vegetation dynamics on model performance of GPP and soil moisture

The following Taylor diagrams show the shift in model performance when activating dynamic vegetation for gross primary production (GPP) and soil moisture (SM).

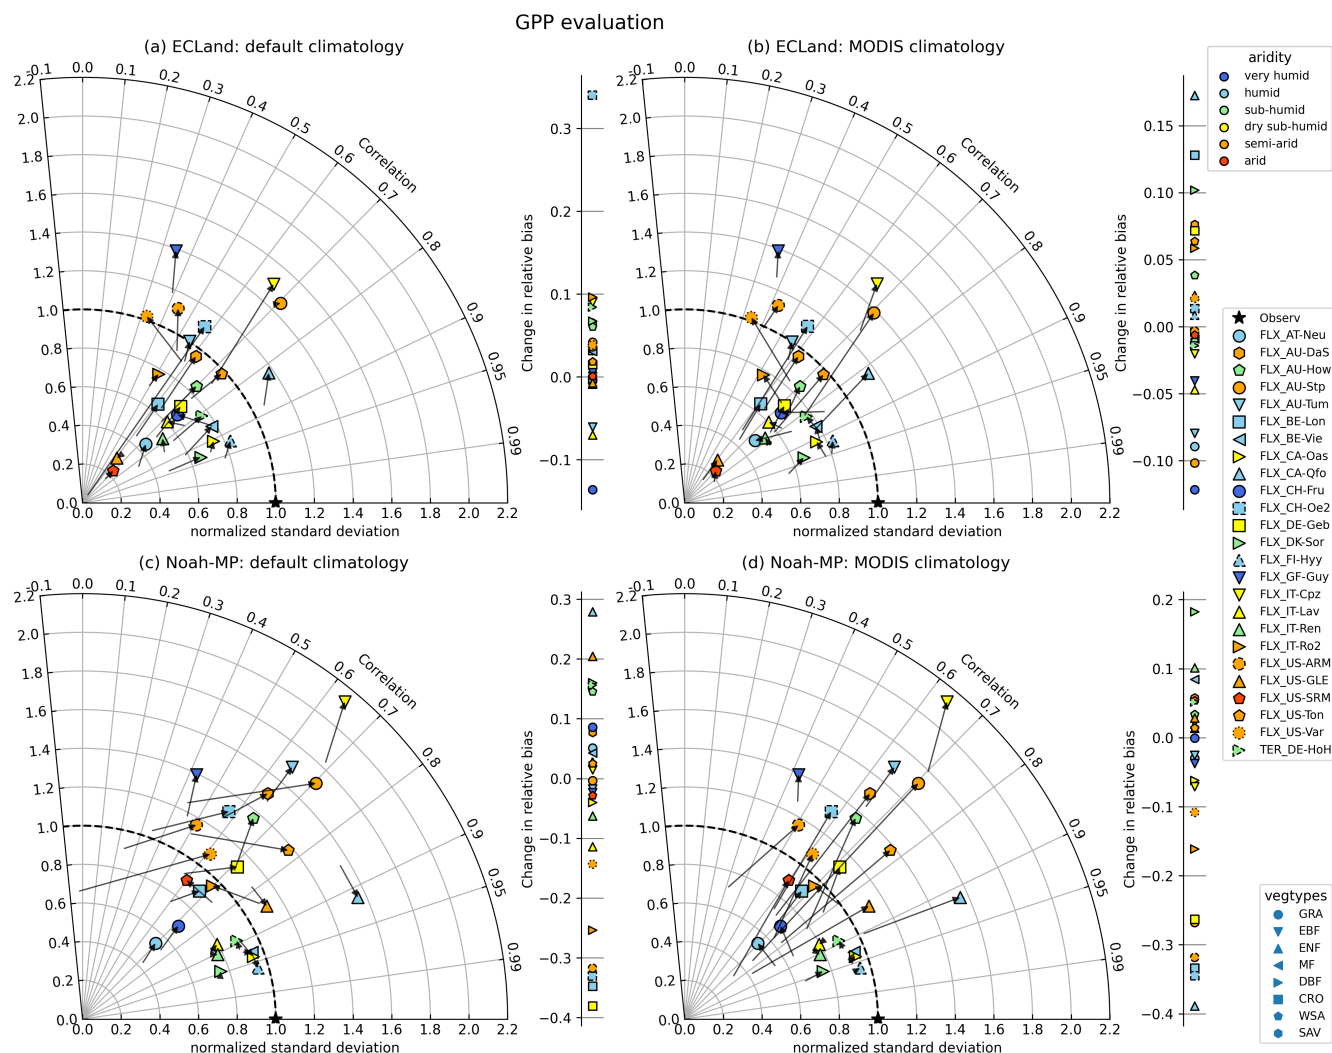

**Figure S1.** Change of model quality metrics for GPP prediction when switching on dynamic vegetation for all included sites and by using *default climatology* (left) or *MODIS climatology* (right). The star (“Observ”) marks the location of the perfect correlation between observation and model and perfect agreement between observed and modelled variance. The model performance of the static runs can be read from the start of each arrow. The point colors indicate the site aridity (top right legend). Vegetation types are symbolized by different marker types (bottom right legend).

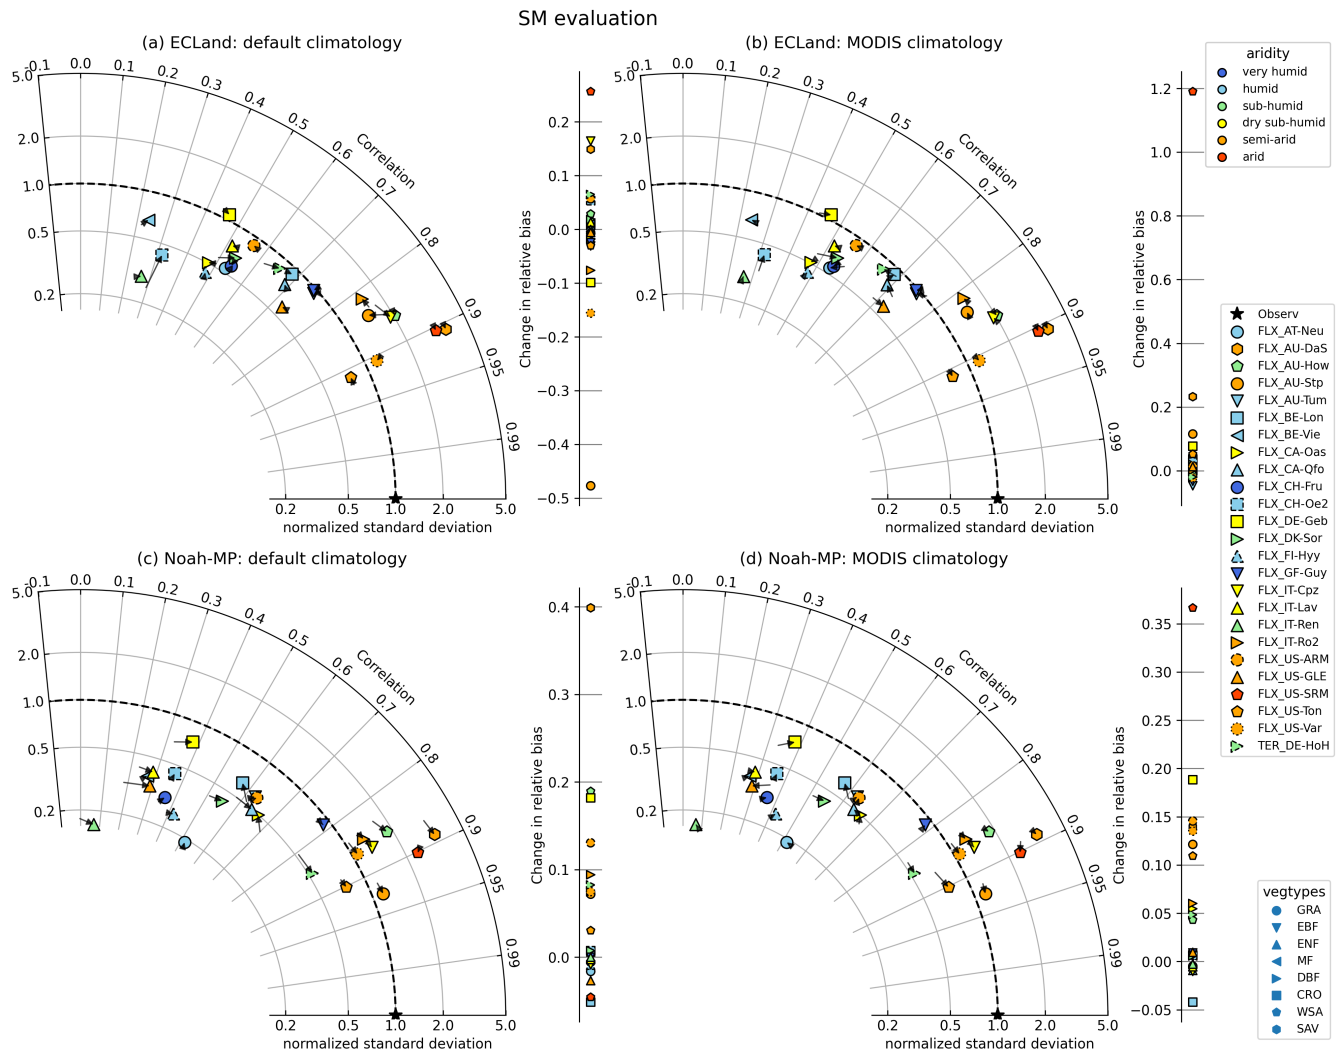

**Figure S2.** Same as before but for soil moisture.

## S.2 Relative bias tables

- Relative biases for all model runs are summarized in tables in following order: leaf area index (LAI), net ecosystem exchange (NEE), gross primary production (GPP), latent heat flux, evaporative fraction and soil moisture.

**Table S1.** Relative bias for LAI. The word climatology is shortened with clim.. MODIS single refers to the MODIS single-year setup.

| <b>ECLand</b> |         |             |         |              |         | <b>Location</b> | <b>Noah-MP</b> |         |             |         |              |         |
|---------------|---------|-------------|---------|--------------|---------|-----------------|----------------|---------|-------------|---------|--------------|---------|
| default clim. |         | MODIS clim. |         | MODIS single |         |                 | default clim.  |         | MODIS clim. |         | MODIS single |         |
| static        | dynamic | static      | dynamic | static       | dynamic |                 | static         | dynamic | static      | dynamic | static       | dynamic |
| -68%          | -77%    | -28%        | -73%    | -31%         | -73%    | AT-Neu          | -54%           | -14%    | 5%          | -14%    | 0%           | -14%    |
| 0%            | 22%     | -24%        | 20%     | -42%         | 19%     | AU-DaS          | -54%           | 51%     | -9%         | 51%     | -3%          | 51%     |
| -7%           | 0%      | -17%        | -1%     | -17%         | -1%     | AU-How          | -75%           | 27%     | -3%         | 27%     | -1%          | 27%     |
| 153%          | -24%    | -51%        | -36%    | -50%         | -36%    | AU-Stp          | 176%           | 231%    | -4%         | 231%    | -5%          | 231%    |
| -31%          | -74%    | -1%         | -72%    | 0%           | -71%    | AU-Tum          | 0%             | -5%     | 0%          | -5%     | 1%           | -5%     |
| 29%           | 51%     | -7%         | 48%     | -10%         | 47%     | BE-Lon          | -28%           | 110%    | 3%          | 110%    | 0%           | 110%    |
| -26%          | -19%    | -16%        | -18%    | -15%         | -18%    | BE-Vie          | 3%             | 9%      | -6%         | 9%      | -6%          | 9%      |
| -4%           | -10%    | -12%        | -11%    | -14%         | -11%    | CA-Oas          | -3%            | -7%     | -3%         | -7%     | -5%          | -10%    |
| 51%           | 52%     | -17%        | 47%     | -17%         | 47%     | CA-Qfo          | 200%           | 92%     | -7%         | 92%     | -7%          | 92%     |
| -19%          | -67%    | -35%        | -67%    | -34%         | -67%    | CH-Fru          | -44%           | -3%     | -5%         | -3%     | -4%          | -3%     |
| -95%          | 141%    | -10%        | 148%    | -10%         | 148%    | CH-Oe2          | 6%             | 146%    | 0%          | 146%    | 0%           | 146%    |
| 56%           | 30%     | -8%         | 26%     | -11%         | 26%     | DE-Geb          | -20%           | 99%     | 3%          | 99%     | -1%          | 99%     |
| -52%          | -32%    | -20%        | -30%    | -10%         | -29%    | DE-HoH          | -45%           | -16%    | -9%         | -16%    | 0%           | -16%    |
| 21%           | 44%     | -11%        | 42%     | -11%         | 42%     | DK-Sor          | 13%            | 62%     | -1%         | 62%     | -1%          | 61%     |
| -8%           | -9%     | -16%        | -10%    | -15%         | -10%    | FI-Hyy          | 62%            | -11%    | -6%         | -11%    | -5%          | -10%    |
| -5%           | -16%    | 4%          | -16%    | 1%           | -16%    | GF-Guy          | -7%            | 4%      | 5%          | 4%      | 3%           | 4%      |
| -32%          | -9%     | 5%          | -7%     | -1%          | -7%     | IT-Cpz          | 57%            | 21%     | 5%          | 21%     | 0%           | 20%     |
| 32%           | -22%    | 0%          | -24%    | -3%          | -24%    | IT-Lav          | 109%           | 14%     | 12%         | 14%     | 8%           | 14%     |
| 2%            | -9%     | -15%        | -9%     | -14%         | -9%     | IT-Ren          | 129%           | 29%     | -5%         | 29%     | -4%          | 29%     |
| 78%           | -1%     | -13%        | -7%     | -14%         | -8%     | IT-Ro2          | -38%           | 22%     | 0%          | 22%     | -2%          | 22%     |
| -9%           | -51%    | -36%        | -53%    | -36%         | -53%    | US-ARM          | 12%            | 144%    | 1%          | 144%    | -3%          | 144%    |
| 266%          | 152%    | -14%        | 135%    | -16%         | 135%    | US-GLE          | 872%           | 348%    | -3%         | 348%    | -5%          | 348%    |
| 182%          | 231%    | -13%        | 221%    | -14%         | 220%    | US-SRM          | 365%           | 186%    | -6%         | 186%    | -1%          | 186%    |
| 149%          | 87%     | -15%        | 77%     | -14%         | 77%     | US-Ton          | 38%            | 93%     | -3%         | 93%     | 0%           | 93%     |
| 18%           | -57%    | -40%        | -61%    | -40%         | -61%    | US-Var          | -2%            | 100%    | -2%         | 100%    | -1%          | 100%    |

**Table S2.** Relative bias for NEE. Note that a positive bias in NEE means an underestimation of carbon uptake by the ecosystem. Abbreviations in the headings are as before.

| <b>ECLand</b> |         |             |         |              |         | <b>Location</b> | <b>Noah-MP</b> |         |             |         |              |         |
|---------------|---------|-------------|---------|--------------|---------|-----------------|----------------|---------|-------------|---------|--------------|---------|
| default clim. |         | MODIS clim. |         | MODIS single |         |                 | default clim.  |         | MODIS clim. |         | MODIS single |         |
| static        | dynamic | static      | dynamic | static       | dynamic |                 | static         | dynamic | static      | dynamic | static       | dynamic |
| -21%          | -20%    | -34%        | -22%    | -33%         | -22%    | AT-Neu          | -19%           | -23%    | -25%        | -23%    | -24%         | -23%    |
| 67%           | 62%     | 69%         | 62%     | 72%          | 62%     | AU-DaS          | -9%            | -6%     | -11%        | -6%     | -11%         | -6%     |
| 70%           | 65%     | 68%         | 65%     | 68%          | 65%     | AU-How          | 8%             | 14%     | 0%          | 14%     | 1%           | 14%     |
| 57%           | 59%     | 65%         | 60%     | 65%          | 60%     | AU-Stp          | 22%            | 2%      | 22%         | 2%      | 22%          | 2%      |
| -2%           | 2%      | -3%         | 2%      | -3%          | 2%      | AU-Tum          | -34%           | -32%    | -34%        | -32%    | -33%         | -32%    |
| -6%           | -6%     | -3%         | -6%     | -3%          | -6%     | BE-Lon          | -12%           | -17%    | -16%        | -17%    | -16%         | -17%    |
| 18%           | 16%     | 15%         | 16%     | 15%          | 16%     | BE-Vie          | -6%            | -6%     | -5%         | -6%     | -5%          | -7%     |
| -6%           | -6%     | -5%         | -5%     | -5%          | -5%     | CA-Oas          | -23%           | -9%     | -22%        | -9%     | -21%         | -10%    |
| -1%           | -2%     | 10%         | -1%     | 11%          | -1%     | CA-Qfo          | -32%           | -31%    | -22%        | -31%    | -22%         | -31%    |
| -17%          | -6%     | -15%        | -6%     | -15%         | -6%     | CH-Fru          | -2%            | -6%     | -6%         | -6%     | -6%          | -6%     |
| 5%            | -20%    | -9%         | -20%    | -9%          | -20%    | CH-Oe2          | -20%           | -26%    | -21%        | -26%    | -21%         | -26%    |
| -7%           | -7%     | -4%         | -7%     | -4%          | -7%     | DE-Geb          | -15%           | -18%    | -19%        | -18%    | -18%         | -18%    |
| 7%            | 3%      | 3%          | 3%      | 2%           | 3%      | DE-HoH          | -16%           | -6%     | -21%        | -6%     | -21%         | -6%     |
| -1%           | -4%     | 0%          | -4%     | 0%           | -4%     | DK-Sor          | -20%           | -7%     | -19%        | -7%     | -19%         | -9%     |
| 5%            | 6%      | 6%          | 6%      | 6%           | 6%      | FI-Hyy          | -3%            | -4%     | -6%         | -4%     | -6%          | -6%     |
| 13%           | 14%     | 13%         | 14%     | 14%          | 14%     | GF-Guy          | -62%           | -54%    | -62%        | -54%    | -61%         | -54%    |
| 15%           | 10%     | 7%          | 9%      | 8%           | 9%      | IT-Cpz          | -40%           | -30%    | -36%        | -30%    | -34%         | -33%    |
| 45%           | 49%     | 46%         | 49%     | 47%          | 49%     | IT-Lav          | 30%            | 32%     | 32%         | 32%     | 33%          | 32%     |
| 20%           | 20%     | 20%         | 20%     | 20%          | 20%     | IT-Ren          | 0%             | 5%      | 7%          | 5%      | 7%           | 5%      |
| 14%           | 19%     | 22%         | 19%     | 22%          | 20%     | IT-Ro2          | -9%            | 3%      | -18%        | 3%      | -17%         | 3%      |
| -3%           | -1%     | -1%         | -1%     | -2%          | -1%     | US-ARM          | -2%            | -9%     | -2%         | -9%     | -3%          | -9%     |
| -1%           | 0%      | 2%          | 0%      | 2%           | 0%      | US-GLE          | 27%            | -19%    | -7%         | -19%    | -7%          | -19%    |
| 60%           | 59%     | 59%         | 59%     | 59%          | 59%     | US-SRM          | -8%            | -6%     | -3%         | -6%     | -4%          | -6%     |
| 10%           | 8%      | 15%         | 9%      | 15%          | 9%      | US-Ton          | -7%            | -9%     | -8%         | -9%     | -9%          | -9%     |
| -11%          | -7%     | -9%         | -7%     | -9%          | -7%     | US-Var          | -4%            | -13%    | -9%         | -13%    | -9%          | -13%    |

**Table S3.** Relative bias for GPP. Abbreviations in the headings are as before.

| <b>ECLand</b> |         |             |         |              |         | <b>Location</b> | <b>Noah-MP</b> |         |             |         |              |         |
|---------------|---------|-------------|---------|--------------|---------|-----------------|----------------|---------|-------------|---------|--------------|---------|
| default clim. |         | MODIS clim. |         | MODIS single |         |                 | default clim.  |         | MODIS clim. |         | MODIS single |         |
| static        | dynamic | static      | dynamic | static       | dynamic |                 | static         | dynamic | static      | dynamic | static       | dynamic |
| -25%          | -25%    | -15%        | -23%    | -15%         | -24%    | AT-Neu          | -25%           | -20%    | -17%        | -20%    | -17%         | -20%    |
| -38%          | -31%    | -39%        | -31%    | -42%         | -31%    | AU-DaS          | -24%           | -16%    | -22%        | -16%    | -21%         | -16%    |
| -44%          | -38%    | -41%        | -38%    | -42%         | -38%    | AU-How          | -33%           | -18%    | -22%        | -18%    | -22%         | -18%    |
| 16%           | 12%     | 0%          | 10%     | 0%           | 10%     | AU-Stp          | 30%            | 30%     | -3%         | 30%     | -4%          | 30%     |
| -8%           | -14%    | -6%         | -14%    | -6%          | -14%    | AU-Tum          | 21%            | 23%     | 21%         | 23%     | 20%          | 23%     |
| -8%           | -5%     | -18%        | -6%     | -19%         | -6%     | BE-Lon          | -7%            | 42%     | 9%          | 42%     | 7%           | 42%     |
| -27%          | -24%    | -23%        | -24%    | -24%         | -24%    | BE-Vie          | -7%            | -3%     | -11%        | -3%     | -11%         | -3%     |
| -13%          | -14%    | -13%        | -14%    | -15%         | -14%    | CA-Oas          | 4%             | 8%      | 2%          | 8%      | 0%           | 5%      |
| -4%           | -3%     | -21%        | -4%     | -22%         | -4%     | CA-Qfo          | 69%            | 41%     | 2%          | 41%     | 1%           | 41%     |
| -15%          | -29%    | -17%        | -29%    | -17%         | -29%    | CH-Fru          | -32%           | -23%    | -23%        | -23%    | -23%         | -23%    |
| -49%          | 15%     | -17%        | 16%     | -17%         | 16%     | CH-Oe2          | -2%            | 35%     | -1%         | 35%     | -1%          | 35%     |
| -6%           | -5%     | -12%        | -5%     | -13%         | -5%     | DE-Geb          | 4%             | 42%     | 16%         | 42%     | 13%          | 42%     |
| -25%          | -17%    | -15%        | -16%    | -13%         | -16%    | DE-HoH          | -16%           | 0%      | -5%         | 0%      | -4%          | 0%      |
| -34%          | -27%    | -38%        | -27%    | -38%         | -27%    | DK-Sor          | -27%           | -11%    | -29%        | -11%    | -29%         | -11%    |
| -25%          | -25%    | -26%        | -25%    | -27%         | -25%    | FI-Hyy          | 10%            | -8%     | -10%        | -8%     | -10%         | -8%     |
| -12%          | -12%    | -8%         | -12%    | -10%         | -12%    | GF-Guy          | -2%            | 4%      | 0%          | 4%      | -1%          | 4%      |
| -22%          | -13%    | -10%        | -12%    | -12%         | -12%    | IT-Cpz          | 16%            | 14%     | 7%          | 14%     | 5%           | 13%     |
| -51%          | -58%    | -53%        | -58%    | -54%         | -58%    | IT-Lav          | -17%           | -29%    | -30%        | -29%    | -32%         | -29%    |
| -39%          | -40%    | -39%        | -40%    | -39%         | -40%    | IT-Ren          | 4%             | -11%    | -21%        | -11%    | -21%         | -11%    |
| 11%           | -1%     | -9%         | -3%     | -9%          | -3%     | IT-Ro2          | -5%            | 30%     | 14%         | 30%     | 14%          | 30%     |
| 12%           | 9%      | 8%          | 8%      | 10%          | 8%      | US-ARM          | 7%             | 38%     | 7%          | 38%     | 7%           | 38%     |
| -22%          | -23%    | -25%        | -23%    | -25%         | -23%    | US-GLE          | 33%            | 13%     | -15%        | 13%     | -16%         | 13%     |
| -23%          | -23%    | -22%        | -23%    | -22%         | -23%    | US-SRM          | 2%             | 5%      | -11%        | 5%      | -10%         | 5%      |
| -7%           | -5%     | -11%        | -5%     | -11%         | -5%     | US-Ton          | -6%            | 3%      | -5%         | 3%      | -5%          | 3%      |
| 12%           | 8%      | 9%          | 7%      | 9%           | 7%      | US-Var          | -1%            | 16%     | 5%          | 16%     | 5%           | 16%     |

**Table S4.** Relative bias for latent heat flux. Abbreviations in the headings are as before.

| ECLand        |         |             |         |              |         | Location | Noah-MP       |         |             |         |              |         |
|---------------|---------|-------------|---------|--------------|---------|----------|---------------|---------|-------------|---------|--------------|---------|
| default clim. |         | MODIS clim. |         | MODIS single |         |          | default clim. |         | MODIS clim. |         | MODIS single |         |
| static        | dynamic | static      | dynamic | static       | dynamic |          | static        | dynamic | static      | dynamic | static       | dynamic |
| -27%          | -31%    | -13%        | -28%    | -13%         | -28%    | AT-Neu   | -25%          | -19%    | -21%        | -19%    | -22%         | -19%    |
| -27%          | -18%    | -30%        | -18%    | -37%         | -19%    | AU-DaS   | -14%          | -13%    | -12%        | -13%    | -12%         | -13%    |
| -53%          | -49%    | -51%        | -48%    | -51%         | -48%    | AU-How   | -43%          | -43%    | -40%        | -43%    | -40%         | -43%    |
| 2%            | -1%     | -3%         | -1%     | -3%          | -1%     | AU-Stp   | 8%            | -1%     | -3%         | -1%     | -4%          | -1%     |
| -11%          | -17%    | -7%         | -17%    | -7%          | -17%    | AU-Tum   | 5%            | 7%      | 4%          | 7%      | 4%           | 7%      |
| -16%          | -14%    | -22%        | -14%    | -24%         | -14%    | BE-Lon   | -3%           | 0%      | -3%         | 0%      | -4%          | 0%      |
| -27%          | -20%    | -19%        | -20%    | -20%         | -20%    | BE-Vie   | -5%           | 1%      | -4%         | 1%      | -4%          | 1%      |
| -9%           | -9%     | -9%         | -9%     | -10%         | -10%    | CA-Oas   | 3%            | 8%      | 4%          | 8%      | 3%           | 7%      |
| -22%          | -21%    | -35%        | -22%    | -36%         | -22%    | CA-Qfo   | -36%          | -36%    | -38%        | -36%    | -38%         | -36%    |
| -21%          | -28%    | -22%        | -29%    | -22%         | -29%    | CH-Fru   | -30%          | -25%    | -29%        | -25%    | -29%         | -25%    |
| -65%          | -1%     | -25%        | 0%      | -25%         | 0%      | CH-Oe2   | 3%            | 9%      | 2%          | 9%      | 2%           | 9%      |
| 8%            | 3%      | -5%         | 2%      | -8%          | 2%      | DE-Geb   | -2%           | 5%      | -1%         | 5%      | -1%          | 5%      |
| -41%          | -33%    | -30%        | -32%    | -29%         | -32%    | DE-HoH   | -12%          | -8%     | -11%        | -8%     | -10%         | -8%     |
| -37%          | -29%    | -36%        | -29%    | -37%         | -29%    | DK-Sor   | -19%          | -12%    | -21%        | -12%    | -21%         | -12%    |
| -22%          | -21%    | -22%        | -21%    | -22%         | -21%    | FI-Hyy   | -34%          | -32%    | -35%        | -32%    | -35%         | -32%    |
| -31%          | -36%    | -26%        | -35%    | -30%         | -36%    | GF-Guy   | -17%          | -15%    | -17%        | -15%    | -16%         | -15%    |
| -21%          | -8%     | -1%         | -7%     | -3%          | -7%     | IT-Cpz   | 17%           | 16%     | 16%         | 16%     | 14%          | 14%     |
| -40%          | -46%    | -42%        | -47%    | -43%         | -47%    | IT-Lav   | -50%          | -47%    | -50%        | -47%    | -50%         | -47%    |
| -41%          | -41%    | -41%        | -41%    | -41%         | -41%    | IT-Ren   | -43%          | -41%    | -43%        | -41%    | -43%         | -41%    |
| -30%          | -38%    | -39%        | -39%    | -39%         | -39%    | IT-Ro2   | -9%           | -6%     | -8%         | -6%     | -8%          | -6%     |
| 6%            | 4%      | 7%          | 4%      | 6%           | 4%      | US-ARM   | 6%            | 11%     | 7%          | 11%     | 6%           | 11%     |
| -62%          | -64%    | -68%        | -64%    | -68%         | -64%    | US-GLE   | -54%          | -63%    | -73%        | -63%    | -73%         | -63%    |
| -22%          | -21%    | -27%        | -21%    | -26%         | -22%    | US-SRM   | -20%          | -19%    | -21%        | -19%    | -21%         | -19%    |
| -5%           | -12%    | -19%        | -13%    | -19%         | -13%    | US-Ton   | -8%           | -7%     | -10%        | -7%     | -10%         | -7%     |
| 29%           | 28%     | 29%         | 27%     | 28%          | 27%     | US-Var   | 21%           | 23%     | 17%         | 23%     | 17%          | 22%     |

**Table S5.** Relative bias for evaporative fraction. Abbreviations in the headings are as before.

|               |         | <b>ECLand</b> |         |              |         | <b>Location</b> | <b>Noah-MP</b> |         |             |         |              |         |
|---------------|---------|---------------|---------|--------------|---------|-----------------|----------------|---------|-------------|---------|--------------|---------|
| default clim. |         | MODIS clim.   |         | MODIS single |         |                 | default clim.  |         | MODIS clim. |         | MODIS single |         |
| static        | dynamic | static        | dynamic | static       | dynamic |                 | static         | dynamic | static      | dynamic | static       | dynamic |
| -34%          | -39%    | -21%          | -37%    | -22%         | -37%    | AT-Neu          | -12%           | -10%    | -9%         | -10%    | -9%          | -10%    |
| -43%          | -36%    | -47%          | -37%    | -53%         | -37%    | AU-DaS          | -40%           | -34%    | -35%        | -34%    | -35%         | -34%    |
| -49%          | -45%    | -47%          | -45%    | -47%         | -45%    | AU-How          | -43%           | -40%    | -38%        | -40%    | -38%         | -40%    |
| -14%          | -18%    | -16%          | -17%    | -17%         | -17%    | AU-Stp          | -1%            | -10%    | -10%        | -10%    | -11%         | -10%    |
| -50%          | -60%    | -45%          | -60%    | -45%         | -60%    | AU-Tum          | -26%           | -23%    | -27%        | -23%    | -27%         | -23%    |
| -4%           | -5%     | -10%          | -6%     | -11%         | -6%     | BE-Lon          | 8%             | 10%     | 9%          | 10%     | 9%           | 10%     |
| -12%          | -10%    | -10%          | -10%    | -10%         | -10%    | BE-Vie          | 0%             | 3%      | 0%          | 3%      | 0%           | 3%      |
| -4%           | -5%     | -5%           | -5%     | -5%          | -5%     | CA-Oas          | -4%            | -1%     | -4%         | -1%     | -4%          | -1%     |
| -21%          | -21%    | -32%          | -22%    | -33%         | -22%    | CA-Qfo          | -33%           | -26%    | -31%        | -26%    | -31%         | -26%    |
| -8%           | -12%    | -9%           | -12%    | -9%          | -12%    | CH-Fru          | -10%           | -9%     | -10%        | -9%     | -10%         | -9%     |
| -32%          | -30%    | -18%          | -29%    | -18%         | -29%    | CH-Oe2          | -4%            | -4%     | -5%         | -4%     | -5%          | -4%     |
| 10%           | 4%      | 0%            | 3%      | -2%          | 3%      | DE-Geb          | 8%             | 13%     | 11%         | 13%     | 10%          | 13%     |
| -52%          | -46%    | -45%          | -45%    | -43%         | -45%    | DE-HoH          | -27%           | -21%    | -26%        | -21%    | -25%         | -21%    |
| -14%          | -11%    | -15%          | -11%    | -15%         | -11%    | DK-Sor          | -9%            | -4%     | -10%        | -4%     | -10%         | -4%     |
| -5%           | -6%     | -6%           | -6%     | -6%          | -6%     | FI-Hyy          | -11%           | -10%    | -12%        | -10%    | -12%         | -10%    |
| -73%          | -78%    | -63%          | -78%    | -67%         | -78%    | GF-Guy          | -48%           | -42%    | -47%        | -42%    | -47%         | -42%    |
| -12%          | 0%      | 9%            | 1%      | 7%           | 1%      | IT-Cpz          | 34%            | 34%     | 33%         | 34%     | 32%          | 33%     |
| -25%          | -31%    | -28%          | -32%    | -29%         | -32%    | IT-Lav          | -33%           | -30%    | -34%        | -30%    | -34%         | -30%    |
| -7%           | -8%     | -8%           | -8%     | -8%          | -8%     | IT-Ren          | -13%           | -12%    | -13%        | -12%    | -13%         | -12%    |
| -7%           | -17%    | -22%          | -18%    | -22%         | -18%    | IT-Ro2          | 6%             | 16%     | 11%         | 16%     | 11%          | 16%     |
| -7%           | -9%     | -7%           | -9%     | -8%          | -9%     | US-ARM          | 1%             | 2%      | 4%          | 2%      | 4%           | 2%      |
| -41%          | -44%    | -50%          | -45%    | -50%         | -45%    | US-GLE          | -29%           | -26%    | -31%        | -26%    | -31%         | -26%    |
| -8%           | -7%     | -11%          | -7%     | -11%         | -7%     | US-SRM          | -15%           | -9%     | -13%        | -9%     | -13%         | -9%     |
| 5%            | 0%      | -6%           | 0%      | -6%          | 0%      | US-Ton          | 1%             | 3%      | 3%          | 3%      | 3%           | 3%      |
| 8%            | 2%      | 7%            | 2%      | 6%           | 2%      | US-Var          | 9%             | 9%      | 15%         | 9%      | 15%          | 9%      |



**Table S6.** Relative bias of soil moisture. Abbreviations in the headings are as before.

| <b>ECLand</b> |         |             |         |              |         | <b>Location</b> | <b>Noah-MP</b> |         |             |         |              |         |
|---------------|---------|-------------|---------|--------------|---------|-----------------|----------------|---------|-------------|---------|--------------|---------|
| default clim. |         | MODIS clim. |         | MODIS single |         |                 | default clim.  |         | MODIS clim. |         | MODIS single |         |
| static        | dynamic | static      | dynamic | static       | dynamic |                 | static         | dynamic | static      | dynamic | static       | dynamic |
| 1%            | 2%      | -5%         | 1%      | -4%          | 1%      | AT-Neu          | -10%           | -11%    | -11%        | -11%    | -10%         | -11%    |
| 695%          | 680%    | 704%        | 681%    | 711%         | 681%    | AU-DaS          | 481%           | 441%    | 455%        | 441%    | 456%         | 441%    |
| 196%          | 193%    | 198%        | 193%    | 198%         | 193%    | AU-How          | 129%           | 110%    | 114%        | 110%    | 114%         | 110%    |
| 116%          | 163%    | 180%        | 169%    | 179%         | 169%    | AU-Stp          | 62%            | 54%     | 66%         | 54%     | 66%          | 54%     |
| 54%           | 57%     | 52%         | 57%     | 52%          | 57%     | AU-Tum          | 29%            | 28%     | 29%         | 28%     | 29%          | 28%     |
| 10%           | 9%      | 13%         | 9%      | 14%          | 9%      | BE-Lon          | -8%            | -13%    | -8%         | -13%    | -8%          | -13%    |
| 37%           | 36%     | 36%         | 36%     | 36%          | 36%     | BE-Vie          | 7%             | 7%      | 7%          | 7%      | 7%           | 6%      |
| 131%          | 133%    | 133%        | 133%    | 133%         | 134%    | CA-Oas          | 73%            | 65%     | 71%         | 65%     | 71%          | 66%     |
| 84%           | 83%     | 86%         | 83%     | 86%          | 83%     | CA-Qfo          | 97%            | 96%     | 95%         | 96%     | 95%          | 96%     |
| -33%          | -32%    | -33%        | -32%    | -33%         | -32%    | CH-Fru          | -44%           | -44%    | -44%        | -44%    | -44%         | -44%    |
| 53%           | 47%     | 50%         | 47%     | 50%          | 47%     | CH-Oe2          | 29%            | 28%     | 29%         | 28%     | 29%          | 28%     |
| 82%           | 92%     | 101%        | 93%     | 102%         | 93%     | DE-Geb          | 45%            | 27%     | 45%         | 27%     | 46%          | 27%     |
| 161%          | 154%    | 152%        | 154%    | 150%         | 153%    | DE-HoH          | 109%           | 101%    | 106%        | 101%    | 105%         | 101%    |
| 80%           | 78%     | 80%         | 78%     | 80%          | 78%     | DK-Sor          | 12%            | 11%     | 11%         | 11%     | 11%          | 11%     |
| 51%           | 50%     | 51%         | 50%     | 50%          | 50%     | FI-Hyy          | -3%            | -4%     | -3%         | -4%     | -4%          | -5%     |
| 251%          | 253%    | 250%        | 253%    | 251%         | 253%    | GF-Guy          | 159%           | 159%    | 160%        | 159%    | 160%         | 159%    |
| 246%          | 230%    | 228%        | 229%    | 230%         | 239%    | IT-Cpz          | 124%           | 125%    | 124%        | 125%    | 123%         | 124%    |
| -87%          | -85%    | -86%        | -85%    | -86%         | -85%    | IT-Lav          | -25%           | -25%    | -25%        | -25%    | -25%         | -25%    |
| -42%          | -42%    | -42%        | -42%    | -42%         | -42%    | IT-Ren          | -11%           | -11%    | -11%        | -11%    | -11%         | -12%    |
| 75%           | 83%     | 84%         | 83%     | 83%          | 83%     | IT-Ro2          | 25%            | 16%     | 22%         | 16%     | 22%          | 16%     |
| -7%           | -1%     | -2%         | 0%      | -2%          | 0%      | US-ARM          | 14%            | 1%      | 16%         | 1%      | 16%          | 1%      |
| 48%           | 48%     | 50%         | 49%     | 50%          | 49%     | US-GLE          | 36%            | 38%     | 39%         | 38%     | 39%          | 38%     |
| 455%          | 429%    | 552%        | 433%    | 552%         | 433%    | US-SRM          | 298%           | 303%    | 339%        | 303%    | 338%         | 303%    |
| 36%           | 39%     | 45%         | 40%     | 45%          | 40%     | US-Ton          | 6%             | 3%      | 14%         | 3%      | 14%          | 3%      |
| 58%           | 74%     | 72%         | 74%     | 72%          | 74%     | US-Var          | 60%            | 53%     | 66%         | 53%     | 66%          | 53%     |
